# Supplementary material for: Disruption of ribosomal hibernation increases translational capacity in diverse microbial hosts
Source: Research Square preprint supplement (doi:10.21203/rs.3.rs-7255729/v1), 2025-08-06
Supplement: Supplementary file 1 [file 8ef12213290449640971456b.xlsx]

## Sheet: INDEX
INDEX
Supplementary Table 1 | Plasmids used in this study
Supplementary Table 2 | Oligonucleotides used in this study
Supplementary Table 3 | Complete results of GSEA-enriched iModulons.
Supplementary Table 4 | Comparison of growth parameters between ΔraiA and WT strains across Biolog PM1 carbon sources
Supplementary Table 5 | Comparison of growth parameters between Δrmf and WT strains across Biolog PM1 carbon sources

## Sheet: Supplementary Table 1
Plasmid	Reference
pCRISPathBrick	Addgene plasmid # 65006
psgC	This work
pdCas9-Bacteria	Addgene plasmid # 44249
pOSIP-CH	Addgene plasmid # 45980
psgC+ELSA-RiboHibe	This work
pSEVA-63-Dual	Gyorgy et al., 2015
pE-FLP	Addgene plasmid # 45978
SAY-IPTG-SapI	Bello-González et al., 2024
SAY-IPTG-Indigoidine	This work
pMSs201-raiA	This work
pMSs201-rmf	Zaslaver et al., 2006
pNHA-GFP	Kinclová et al., 2001
pNHX1-GFP	Rosas-Santiago et al., 2025
pVPH1-GFP	Rosas-Santiago et al., 2025
pMBEC6	Addgene plasmid # 187598

## Sheet: Supplementary Table 2
Primer name	Sequence (5' to 3')	Description
IndigoCluster_FWR	AGAAAGAGGGGAAATACTAGAGATATACATATGACCCTGCAG	Gibson Assembly for cloning the Indigoidine cluster
IndigoCluster_REV	GCCTCTTTTCTGGAATTTGGGAGCTCTTACGCACCAAC	Gibson Assembly for cloning the Indigoidine cluster
FWD-No-dCas9	TAATACTATAGAACACGCATTGATTTGAGTC	Removing dCas9 from the plasmid pCRISPathBrick
REV-No-dCas9	TCTATAGTATTAAGTATTGTTTTATGGCTG	Removing dCas9 from the plasmid pCRISPathBrick
OB-rpsL	TGCTGTTTTGAATGGTCCCAAAACGGGATTTTAAGCCGCAGGAGTATAACACACGTTTTAGAGCTATGCTGTTTTGAATGGTCCCAAAACTGAGACCTGTCTCGGA	Cloning the guide to repress the essential gel rpsL
HP1	GGAATCAATGCCTGAGTG	Verify the insertion of dCas9 on the pOSIP-CH
HP2	ACTTAACGGCTGACATGG	Verify the insertion of dCas9 on the pOSIP-CH
HP3	ACGAGTATCGAGATGGCA	Verify the insertion of dCas9 on the pOSIP-CH
HP4	GGCATCAACAGCACATTC	Verify the insertion of dCas9 on the pOSIP-CH
SCR_FWR	ACACGCATTGATTTGAGTCAGCT	Verify the insertion of the guides on the plasmid CRISPathBrick and psgC
SCR_REV	ACTCAACAAGTCTCAGTGTGCTG	Verify the insertion of the guides on the plasmid CRISPathBrick and psgC
tet_gibs_FWR	ATTCGAGCTCGGTACCCGGGTTAAGACCCACTTTCACATTTAAG	Amplification of the segment tetR+dCas9 from pdCas9-Bacteria for a posterior gibson assembly
tet_gibs_REV	CATCTCGAGGCATGCCTGCATTAGTCACCTCCTAGCTG	Amplification of the segment tetR+dCas9 from pdCas9-Bacteria for a posterior gibson assembly
RBS_FWR	ATCAAATGACGGGCGCAGGTGGCAAAAATGATGGATAAGAAATACTCAATAGGCT	Modification of the RBS of dCas9
RBS_REV	CATTTTTGCCACCTGCGCCCGTCATTTGATTTCTCTATCACTGATAGGGAGT	Modification of the RBS of dCas9
ELSA-Ribo-Hibe_FWR	TGCTGTTTTGAATGGTCCCATTGACAGTAGATCAGAGG	Gibson assembly with guides to repress 3 ribosome hibernation factors
ELSA-Ribo-Hibe_REV	AGCTTCCGAGACAGGTCTCATACGATACCAGAGAACAC	Gibson assembly with guides to repress 3 ribosome hibernation factors
pMBEC6_F	CATAAAGGATTTGCGACTACG	Forward primer for sequencing/verifying the gRNA insert in pMBEC6.
pMBEC6_R	CCGCTCACAATTCCACAC	Reverse primer for sequencing/verifying the gRNA insert in pMBEC6.
PP0951_F_Q47*	GTGGGAAGCTTCAGCAGAAGGTCG	Forward oligo for gRNA spacer targeting the hpf gene (PP_0951).
PP0951_R_Q47*	AAACCGACCTTCTGCTGAAGCTTC	Reverse oligo for gRNA spacer targeting the hpf gene (PP_0951).
5502_F_Q18*	GTGGGGCTACCAATACGGGGTCAC	Forward oligo for gRNA spacer targeting the rmf gene (PP_5502).
5502_R_Q18*	AAACGTGACCCCGTATGGTAGCCC	Reverse oligo for gRNA spacer targeting the rmf gene (PP_5502).
PP_0951_seq_F	ATGTAGAAGTCACCCAGCCAC	Forward primer for sequencing the hpf (PP_0951) genomic locus.
PP_0951_seq_R	GCAGCTGCACCTGCAGCAGCTTTGC	Reverse primer for sequencing the hpf (PP_0951) genomic locus.
PP_5502_seq_F	TTAAGCGTGATCCGTTGGAAGAG	Forward primer for sequencing the rmf (PP_5502) genomic locus.
PP_5502_seq_R	TCAGCCAAGCGGTGATTTCGTTGAG	Reverse primer for sequencing the rmf (PP_5502) genomic locus.
W_0951_Q47_WF	GCCGACAAGCTCGACCGAC	Forward primer, specific for the Wild-Type hpf allele.
W_0951_Q47_MF	GCCGACAAGCTCGACCGAT	Forward primer, specific for the mutant hpf allele.
W_0951_Q84_MR	GGGTCGCCTCGACCTTCTCGA	Common reverse primer for screening the hpf locus.
W_5502_Q18_WF	GAAAGAGCATATTCACGTGGCTAAC	Forward primer, specific for the Wild-Type rmf allele.
W_5502_Q18_MF	GAAAGAGCATATTCACGTGGCTAAT	Forward primer, specific for the mutant rmf allele.
W_5502_W40_MR	CGACCTTCACGCAGCCGTTGATAT	Common reverse primer for screening the rmf locus.

## Sheet: Supplementary Table 3
iModulon	NES	pval	FDR
RpoS	-2.44079	0	0
Lysine/T2SS	-2.21312	0	0
crp KO-1	-2.21259	0	0
Maltose	-2.12992	0	0
FHL	-2.12776	0	0
Leu/Val/Ile	-1.97555	0	0.00238971
BasR	-1.96197	0.00285714	0.00307249
GadXW	-1.94977	0	0.00328586
Curli-1	-1.93876	0	0.00385009
ppGpp	-1.9327	0	0.00370405
NtrC-2	-1.86302	0	0.00923298
Glutamine	-1.86281	0.00515464	0.00846357
RpoE	-1.77043	0.00524934	0.0236214
Tryptophan	1.65302	0.0102564	0.0460386
Acetate	1.68192	0.00696864	0.0334334
Thr/Ser-2	1.69045	0.00176991	0.0313541
FucR/AllR/AraC	1.69978	0.00758725	0.0303882
Thr/Ser-1	1.70776	0.00762195	0.0287903
Methionine	1.71236	0.0060423	0.0284221
Dipeptide	1.78565	0.00166667	0.00889381
FucR/ExuR	1.79805	0	0.00771885
Galactose	1.82888	0	0.0044877
Cysteine-1	1.85036	0.0014245	0.0030292
UC-3	1.90719	0	0.00102576
CpxR	1.94956	0	0.00029918
ArcA	1.98721	0	0
Crp-1	2.36318	0	0
FliA	2.48165	0	0
FlhDC-1	2.48943	0	0
FlhDC-2	2.63373	0	0

## Sheet: Supplementary Table 4
Sample	Growth Rate raiA	MaxOD	GR_std	MaxOD_std	Growth Rate Diff	MaxOD Diff	Growth Rate % Change	MaxOD % Change	Category
A1 AllNegativeControl	0	0	0	0	0	0	0	0	No Growth
A2 L-Arabinose	0	0	0	0	0	0	0	0	No Growth
A3 N-Acetyl-D-Glucosamine	0.617	1.266	0.00447429	0.000602075	0.02	0.24	3.3500837520938056	23.391812865497077	Higher OD Only
A4 D-SaccharicAcid	0.591	0.489	0.1577205937749462	0.00150772	-0.004	0.019	-0.672269	4.0425531914893655	No Change
A5 SuccinicAcid	0.686	0.329	0.0222381	0.00248702	0.314	-0.063	84.40860215053765	-16.0714	Higher GR, Lower OD
A6 D-Galactose	0.63	1.17	0.0146157	0.00308815	0.133	0.1939999999999999	26.76056338028169	19.877049180327862	Greater
A7 L-AsparticAcid	0	0	0	0	-0.455	-0.483	-100	-100	Lesser
A8 L-Proline	0	0	0	0	0	0	0	0	No Growth
A9 D-Alanine	0	0	0	0	-0.518	-0.666	-100	-100	Lesser
A10 D-Trehalose	0.525	1.156	0.0124063	0.00447084	0.015	0.1909999999999999	2.9411764705882377	19.792746113989637	Higher OD Only
A11 D-Mannose	0.732	1.026	0.0266251	0.000652435	0.13	0.157	21.594684385382063	18.06674338319908	Greater
A12 Dulcitol	0	0	0	0	-0.656	-0.617	-100	-100	Lesser
B1 D-Serine	0.798	0.738	0.000546451	0.00661793	0.194	0.452	32.119205298013256	158.04195804195805	Greater
B2 D-Sorbitol	0.636	1.143	0.0484094	0.00259616	0.02	0.284	3.24675	33.0617	Higher OD Only
B3 Glycerol	0.466	1.15	0.0283256	0.0094656	-0.078	0.2499999999999999	-14.3382	27.77777777777776	Higher OD, Lower GR
B4 L-Fucose	0.609	1.27	0.0294297	0.00345465	0.2209999999999999	0.2610000000000001	56.95876288659792	25.867195242814685	Greater
B5 D-GlucuronicAcid	0.506	0.622	0.00211762	0.0178669	-0.133	0.065	-20.8138	11.669658886894064	Higher OD, Lower GR
B6 D-GluconicAcid	0.709	0.732	0.01465	0.00975976	-0.027	0.143	-3.66848	24.27843803056028	Higher OD Only
B7 D L--GlycerolPhosphate	0	0	0	0	-0.662	-0.272	-100	-100	Lesser
B8 D-Xylose	0.244	0.917	0.00833982	0.00245631	-0.082	0.093	-25.1534	11.2864	Higher OD, Lower GR
B9 L-LacticAcid	0.847	0.292	0.1161809600068607	0.00655174	0.847	0.292	0	0	No Growth
B10 FormicAcid	0	0	0	0	0	0	0	0	No Growth
B11 D-Mannitol	0.866	1.001	0.00637676	0.0143744	0.119	0.1589999999999999	15.930388219544843	18.883610451306403	Greater
B12 L-GlutamicAcid	0	0	0	0	0	0	0	0	No Growth
C1 D-Glucose-6-Phosphate	0.983	0.561	0.0116078	0.000866873	0.073	0.026	8.021978021978017	4.859813084112154	No Change
C2 D-GalactonicAcid--Lactone	0.564	0.695	0.011333	0.0136555	-0.177	0.081	-23.8866	13.192182410423449	Higher OD, Lower GR
C3 D L-MalicAcid	0.481	0.491	0.0594898	0.0111721	-0.084	-0.01	-14.8673	-1.99601	Lower GR Only
C4 D-Ribose	0.286	1.016	0.0212309	0.0154015	-0.045	0.2049999999999999	-13.5952	25.277435265104803	Higher OD, Lower GR
C5 Tween20	0	0	0	0	0	0	0	0	No Growth
C6 L-Rhamnose	0	0	0	0	0	0	0	0	No Growth
C7 D-Fructose	0.928	0.896	0.0207501	0.00104219	0.2390000000000001	0.052	34.688	6.161137440758299	Higher GR Only
C8 AceticAcid	0.922	0.33	0.0804591	0.00270391	0.212	0.005	29.859154929577475	1.5384615384615397	Higher GR Only
C9 -D-Glucose	0.991	1.016	0.0433499	0.0109934	0.3269999999999999	0.121	49.24698795180722	13.519553072625698	Greater
C10 Maltose	0.428	1.016	0.0335041	0.00724583	-0.263	0.144	-38.0608	16.51376146788991	Higher OD, Lower GR
C11 D-Melezitose	0	0	0	0	0	0	0	0	No Growth
C12 Thymidine	0.694	0.399	0.0100435	0.00472688	-0.044	0.005	-5.96206	1.2690355329949248	No Change
D1 L-Asparagine	0	0	0	0	0	0	0	0	No Growth
D2 D-AsparticAcid	0	0	0	0	0	0	0	0	No Growth
D3 D-GlucosaminicAcid	0	0	0	0	0	0	0	0	No Growth
D4 1 2-Propanediol	0	0	0	0	0	0	0	0	No Growth
D5 Tween40	0	0	0	0	0	0	0	0	No Growth
D6 -Keto-GlutaricAcid	0.603	0.413	0.00125976	0.000631949	-0.071	0.008	-10.5341	1.9753086419752963	Lower GR Only
D7 -Keto-ButyricAcid	0	0	0	0	0	0	0	0	No Growth
D8 -Methyl-D-Galactoside	0.803	0.434	0.0334665	0.00281849	0.092	-0.506	12.939521800281303	-53.8298	Higher GR, Lower OD
D9 D-Lactose	0	0	0	0	0	0	0	0	No Growth
D10 Lactulose	0	0	0	0	0	0	0	0	No Growth
D11 Sucrose	0	0	0	0	0	0	0	0	No Growth
D12 Uridine	1.218	0.558	0.0685812	0.000602877	0.514	0.085	73.01136363636364	17.97040169133194	Greater
E1 L-Glutamine	0	0	0	0	-0.635	-0.318	-100	-100	Lesser
E2 m-TartaricAcid	0	0	0	0	-0.353	-0.292	-100	-100	Lesser
E3 D-Glucose-1-Phosphate	0.656	0.55	0.0478563	0.00313971	0.259	0.094	65.23929471032746	20.614035087719305	Greater
E4 D-Fructose-6-Phosphate	0.743	0.524	0.0252072	0.00296644	0.121	0.039	19.45337620578778	8.041237113402069	Higher GR Only
E5 Tween80	0	0	0	0	0	0	0	0	No Growth
E6 -HydroxyGlutaricAcid--Lactone	0	0	0	0	0	0	0	0	No Growth
E7 -HydroxyButyricAcid	0	0	0	0	0	0	0	0	No Growth
E8 -Methyl-D-Glucoside	0.596	0.683	0.0335138	0.0025091	-0.054	-0.024	-8.30769	-3.39463	No Change
E9 Adonitol	0	0	0	0	0	0	0	0	No Growth
E10 Methyl--D-Galactoside	0.556	1.068	0.0586703	0.000113456	-0.148	0.135	-21.0227	14.469453376205788	Higher OD, Lower GR
E11 2-DeoxyAdenosine	0.67	0.456	0.0268807	0.00652358	0.031	0.065	4.851330203442884	16.624040920716112	Higher OD Only
E12 Adenosine	0.67	0.499	0.0697412	0.00521763	0.001	0.1009999999999999	0.1494768310911809	25.376884422110543	Higher OD Only
F1 Glycyl-L-AsparticAcid	0.785	0.473	0.0265506	0.00121659	0.276	-0.005	54.223968565815326	-1.04603	Higher GR Only
F2 CitricAcid	0	0	0	0	0	0	0	0	No Growth
F3 myo-Inositol	0	0	0	0	0	0	0	0	No Growth
F4 D-Threonine	0	0	0	0	0	0	0	0	No Growth
F5 FumaricAcid	0.328	0.388	0.0432591	0.0194133	-0.188	-0.115	-36.4341	-22.8628	Lesser
F6 BromoSuccinicAcid	0	0	0	0	0	0	0	0	No Growth
F7 PropionicAcid	0	0	0	0	-0.616	-0.517	-100	-100	Lesser
F8 MucicAcid	0.341	0.544	0.0687753	0.0184057	-0.319	0.027	-48.3333	5.222437137330759	Lower GR Only
F9 GlycolicAcid	0	0	0	0	-0.554	-0.415	-100	-100	Lesser
F10 GlyoxylicAcid	0	0	0	0	-0.493	-0.275	-100	-100	Lesser
F11 D-Cellobiose	0	0	0	0	0	0	0	0	No Growth
F12 Inosine	0.963	0.635	0.0281418	0.0115379	0.254	0.1059999999999999	35.82510578279267	20.03780718336484	Greater
G1 Glycyl-L-GlutamicAcid	0.659	0.333	0.0329071	0.00670158	0.036	-0.178	5.778491171749604	-34.8337	Lower OD Only
G2 TricarballylicAcid	0	0	0	0	0	0	0	0	No Growth
G3 L-Serine	0.564	0.341	0.0399043	0.00222777	-0.224	-0.153	-28.4264	-30.9717	Lesser
G4 L-Threonine	0	0	0	0	0	0	0	0	No Growth
G5 L-Alanine	0.433	0.71	0.00608992	0.00132999	0.1079999999999999	0.1079999999999999	33.230769230769226	17.940199335548172	Greater
G6 L-Alanyl-Glycine	0.542	0.534	0.00767788	0.000258005	0.079	0.107	17.062634989200866	25.05854800936769	Greater
G7 AcetoaceticAcid	0	0	0	0	0	0	0	0	No Growth
G8 N-Acetyl--D-Mannosamine	0	0	0	0	0	0	0	0	No Growth
G9 Mono-MethylSuccinate	0	0	0	0	0	0	0	0	No Growth
G10 MethylPyruvate	0.907	0.343	0.0802937	0.00235835	0.907	0.343	0	0	No Growth
G11 D-MalicAcid	0.568	0.381	0.0135721	0.000451161	-0.117	-0.074	-17.0803	-16.2637	Lesser
G12 L-MalicAcid	0	0	0	0	-0.554	-0.398	-100	-100	Lesser
H1 Glycyl-L-Proline	0.582	0.698	0.0377587	0.00285354	-0.09	-0.077	-13.3929	-9.93548	Lower GR Only
H2 p-HydroxyPhenylAceticAcid	0	0	0	0	0	0	0	0	No Growth
H3 m-HydroxyPhenylAceticAcid	0	0	0	0	0	0	0	0	No Growth
H4 Tyramine	0	0	0	0	0	0	0	0	No Growth
H5 D-Fucose	0	0	0	0	0	0	0	0	No Growth
H6 L-Fucose	0	0	0	0	0	0	0	0	No Growth
H7 Glucuronamide	0	0	0	0	0	0	0	0	No Growth
H8 PyruvicAcid	1.034	0.426	0.00323314	0.00060562	0.219	0.069	26.87116564417179	19.327731092436977	Greater
H9 L-GalactonicAcid--Lactone	0.614	0.549	0.00551255	0.00205043	-0.05	-0.016	-7.53012	-2.83186	No Change
H10 D-GalacturonicAcid	0.645	0.544	0.0234264	0.000827995	0.068	-0.005	11.785095320623928	-0.910747	Higher GR Only
H11 Phenylethylamine	0	0	0	0	0	0	0	0	No Growth
H12 2-Aminoethanol	0	0	0	0	0	0	0	0	No Growth

## Sheet: Supplementary Table 5
Sample	Growth Rate rmf	MaxOD	GR_std	MaxOD_std	Growth Rate Diff	MaxOD Diff	Growth Rate % Change	MaxOD % Change	Category
A1 AllNegativeControl	0	0	0	0	0	0	0	0	No Growth
A2 L-Arabinose	0	0	0	0	0	0	0	0	No Growth
A3 N-Acetyl-D-Glucosamine	0.917	1.099	0.0487712	0.00603045	0.32	0.073	53.60134003350085	7.115009746588689	Higher GR Only
A4 D-SaccharicAcid	0.623	0.471	0.0713931	0.00316005	0.028	0.001	4.70588	0.2127659574468087	No Change
A5 SuccinicAcid	1.022	0.355	0.0553607	0.0032075	0.65	-0.037	174.7311827956989	-9.43878	Higher GR Only
A6 D-Galactose	1.23	0.938	0.0351803	0.00734914	0.733	-0.038	147.48490945674044	-3.89344	Higher GR Only
A7 L-AsparticAcid	0.948	0.356	0.0320877	0.0165298	0.4929999999999999	-0.127	108.35164835164836	-26.294	Higher GR, Lower OD
A8 L-Proline	0	0	0	0	0	0	0	0	No Growth
A9 D-Alanine	0.492	0.67	0.0223212	0.00797854	-0.026	0.004	-5.01931	0.6006006006006012	No Change
A10 D-Trehalose	0.547	1.004	0.0311108	0.00117925	0.037	0.039	7.2549	4.041450777202076	No Change
A11 D-Mannose	0.789	0.894	0.00287887	0.00295026	0.187	0.025	31.06312292358805	2.876869965477563	Higher GR Only
A12 Dulcitol	0.445	0.689	0.0518237	0.00451667	-0.211	0.072	-32.1646	11.66936790923824	Higher OD, Lower GR
B1 D-Serine	0.924	0.381	0.00534136	0.0162083	0.32	0.095	52.98013245033114	33.21678321678323	Greater
B2 D-Sorbitol	1.07	0.959	0.063942	0.00137621	0.454	0.1	73.70129870129871	11.641443538998834	Greater
B3 Glycerol	1.029	1.141	0.0645321	0.00769595	0.4849999999999999	0.241	89.15441176470586	26.77777777777778	Greater
B4 L-Fucose	0.744	1.003	0.0384851	0.00335358	0.356	-0.006	91.75257731958764	-0.594648	Higher GR Only
B5 D-GlucuronicAcid	1.43	0.567	0.0193851	0.00478196	0.7909999999999999	0.01	123.78716744913928	1.7953321364452235	Higher GR Only
B6 D-GluconicAcid	1.886	0.696	0.00460857	0.00894532	1.15	0.1069999999999999	156.25	18.16638370118845	Greater
B7 D L--GlycerolPhosphate	1.439	0.266	0.00372338	0.00134297	0.777	-0.006	117.37160120845924	-2.20588	Higher GR Only
B8 D-Xylose	1.093	0.927	0.0584122	0.0171896	0.7669999999999999	0.103	235.27607361963183	12.50000000000001	Greater
B9 L-LacticAcid	2.029	0.435	0.0187151	0.00524845	2.029	0.435	0	0	No Growth
B10 FormicAcid	0	0	0	0	0	0	0	0	No Growth
B11 D-Mannitol	1.214	0.904	0.0197191	0.001324	0.4669999999999999	0.062	62.51673360107095	7.363420427553451	Higher GR Only
B12 L-GlutamicAcid	0	0	0	0	0	0	0	0	No Growth
C1 D-Glucose-6-Phosphate	1.135	0.623	0.0962183	0.0185855	0.2249999999999999	0.088	24.72527472527472	16.448598130841113	Greater
C2 D-GalactonicAcid--Lactone	1.248	0.708	0.0542461	0.00145747	0.507	0.094	68.42105263157895	15.309446254071656	Greater
C3 D L-MalicAcid	0.869	0.548	0.0508514	0.00595612	0.304	0.047	53.80530973451329	9.381237524950109	Higher GR Only
C4 D-Ribose	0.658	0.9	0.0310372	0.0113724	0.327	0.089	98.79154078549848	10.974106041923546	Greater
C5 Tween20	0.279	0.519	0.0777367	0.1551198464741628	0.279	0.519	0	0	No Growth
C6 L-Rhamnose	0	0	0	0	0	0	0	0	No Growth
C7 D-Fructose	1.392	0.834	0.0186756	0.000351414	0.703	-0.01	102.03193033381712	-1.18483	Higher GR Only
C8 AceticAcid	0.943	0.305	0.0418921	0.00133984	0.2329999999999999	-0.02	32.816901408450704	-6.15385	Higher GR Only
C9 -D-Glucose	1.311	0.939	0.0570299	0.00457132	0.6469999999999999	0.044	97.43975903614457	4.916201117318428	Higher GR Only
C10 Maltose	0.858	0.828	0.00378795	0.000963807	0.167	-0.044	24.167872648335752	-5.04587	Higher GR Only
C11 D-Melezitose	0	0	0	0	0	0	0	0	No Growth
C12 Thymidine	0.685	0.463	0.0192111	0.0153386	-0.053	0.069	-7.18157	17.512690355329948	Higher OD Only
D1 L-Asparagine	0	0	0	0	0	0	0	0	No Growth
D2 D-AsparticAcid	0	0	0	0	0	0	0	0	No Growth
D3 D-GlucosaminicAcid	0	0	0	0	0	0	0	0	No Growth
D4 1 2-Propanediol	0	0	0	0	0	0	0	0	No Growth
D5 Tween40	0	0	0	0	0	0	0	0	No Growth
D6 -Keto-GlutaricAcid	1.01	0.497	0.0248977	0.00523129	0.3359999999999999	0.092	49.851632047477736	22.71604938271604	Greater
D7 -Keto-ButyricAcid	0	0	0	0	0	0	0	0	No Growth
D8 -Methyl-D-Galactoside	0.61	0.815	0.00606989	0.00453476	-0.101	-0.125	-14.2053	-13.2979	Lesser
D9 D-Lactose	0	0	0	0	0	0	0	0	No Growth
D10 Lactulose	0	0	0	0	0	0	0	0	No Growth
D11 Sucrose	0	0	0	0	0	0	0	0	No Growth
D12 Uridine	1.187	0.455	0.0391836	0.0065703	0.4830000000000001	-0.018	68.60795454545456	-3.8055	Higher GR Only
E1 L-Glutamine	0.908	0.313	0.0243516	0.00846873	0.273	-0.005	42.99212598425197	-1.57233	Higher GR Only
E2 m-TartaricAcid	0	0	0	0	-0.353	-0.292	-100	-100	Lesser
E3 D-Glucose-1-Phosphate	1.101	0.474	0.0397861	0.00101449	0.704	0.018	177.3299748110831	3.947368421052623	Higher GR Only
E4 D-Fructose-6-Phosphate	1.112	0.564	0.000735491	0.000905255	0.4900000000000001	0.079	78.77813504823152	16.288659793814425	Greater
E5 Tween80	0	0	0	0	0	0	0	0	No Growth
E6 -HydroxyGlutaricAcid--Lactone	0	0	0	0	0	0	0	0	No Growth
E7 -HydroxyButyricAcid	0	0	0	0	0	0	0	0	No Growth
E8 -Methyl-D-Glucoside	1.02	0.803	0.0113798	0.0135995	0.37	0.096	56.92307692307692	13.578500707213593	Greater
E9 Adonitol	0	0	0	0	0	0	0	0	No Growth
E10 Methyl--D-Galactoside	0.992	0.787	0.0509009	0.0046803	0.288	-0.146	40.90909090909092	-15.6484	Higher GR, Lower OD
E11 2-DeoxyAdenosine	0.718	0.484	0.00262949	0.00321158	0.079	0.093	12.363067292644752	23.7852	Greater
E12 Adenosine	0.373	0.389	0.04207	0.00494161	-0.296	-0.009	-44.2451	-2.26131	Lower GR Only
F1 Glycyl-L-AsparticAcid	1.017	0.559	0.0157893	0.000573109	0.5079999999999999	0.081	99.8035	16.945606694560684	Greater
F2 CitricAcid	0	0	0	0	0	0	0	0	No Growth
F3 myo-Inositol	0	0	0	0	0	0	0	0	No Growth
F4 D-Threonine	0	0	0	0	0	0	0	0	No Growth
F5 FumaricAcid	1.35	0.47	0.0248638	0.00115242	0.8340000000000001	-0.033	161.6279069767442	-6.56064	Higher GR Only
F6 BromoSuccinicAcid	0.771	0.266	0.0377114	0.000440678	0.771	0.266	0	0	No Growth
F7 PropionicAcid	0.952	0.417	0.0261175	0.00119245	0.3359999999999999	-0.1	54.54545454545454	-19.3424	Higher GR, Lower OD
F8 MucicAcid	0.878	0.588	0.0150532	0.00146282	0.2179999999999999	0.071	33.030303030303024	13.733075435203084	Greater
F9 GlycolicAcid	1.462	0.439	0.071793	0.00647623	0.908	0.024	163.899	5.783132530120487	Higher GR Only
F10 GlyoxylicAcid	1.537	0.325	0.0246581	0.00870028	1.044	0.05	211.76470588235296	18.181818181818176	Greater
F11 D-Cellobiose	0	0	0	0	0	0	0	0	No Growth
F12 Inosine	0.954	0.613	0.0455246	0.00280582	0.245	0.084	34.55571227080395	15.879017013232508	Greater
G1 Glycyl-L-GlutamicAcid	0.948	0.542	0.0210474	0.00489309	0.3249999999999999	0.031	52.16693418940609	6.06654	Higher GR Only
G2 TricarballylicAcid	0	0	0	0	0	0	0	0	No Growth
G3 L-Serine	1.328	0.545	0.133584	0.00332468	0.54	0.051	68.52791878172589	10.323886639676122	Greater
G4 L-Threonine	0	0	0	0	0	0	0	0	No Growth
G5 L-Alanine	0.677	0.592	0.0422137	0.00546814	0.352	-0.01	108.3076923076923	-1.66113	Higher GR Only
G6 L-Alanyl-Glycine	0.91	0.485	0.0263189	0.00153209	0.447	0.058	96.54427645788336	13.583138173302109	Greater
G7 AcetoaceticAcid	0	0	0	0	0	0	0	0	No Growth
G8 N-Acetyl--D-Mannosamine	0	0	0	0	0	0	0	0	No Growth
G9 Mono-MethylSuccinate	0	0	0	0	0	0	0	0	No Growth
G10 MethylPyruvate	2.292	0.303	0.0323723	0.00112249	2.292	0.303	0	0	No Growth
G11 D-MalicAcid	1.904	0.543	0.077496	0.00286467	1.219	0.088	177.95620437956202	19.340659340659343	Greater
G12 L-MalicAcid	1.013	0.427	0.012975	0.00407334	0.4589999999999998	0.029	82.85198555956676	7.286432160804013	Higher GR Only
H1 Glycyl-L-Proline	0.721	0.823	0.0187947	0.0024389	0.049	0.048	7.291666666666656	6.193548387096765	No Change
H2 p-HydroxyPhenylAceticAcid	0	0	0	0	0	0	0	0	No Growth
H3 m-HydroxyPhenylAceticAcid	0	0	0	0	0	0	0	0	No Growth
H4 Tyramine	0	0	0	0	0	0	0	0	No Growth
H5 D-Fucose	0	0	0	0	0	0	0	0	No Growth
H6 L-Fucose	0	0	0	0	0	0	0	0	No Growth
H7 Glucuronamide	0	0	0	0	0	0	0	0	No Growth
H8 PyruvicAcid	1.738	0.568	0.0134165	0.00209622	0.923	0.2109999999999999	113.2515337423313	59.10364145658262	Greater
H9 L-GalactonicAcid--Lactone	1.371	0.609	0.0132216	0.00419543	0.707	0.044	106.47590361445782	7.787610619469035	Higher GR Only
H10 D-GalacturonicAcid	1.155	0.599	0.054508	0.0124963	0.5780000000000001	0.05	100.17331022530333	9.107468123861551	Higher GR Only
H11 Phenylethylamine	0	0	0	0	0	0	0	0	No Growth
H12 2-Aminoethanol	0	0	0	0	0	0	0	0	No Growth
